# Supplementary material for: Comparative genomics revealed the gene evolution and functional divergence of magnesium transporter families in Saccharum
Source: PubMed Central journal article supplement (PMC6345045; doi:10.1186/s12864-019-5437-3), 2019-01-24
Supplement: 12864_2019_5437_MOESM19_ESM.pdf [file 12864_2019_5437_MOESM19_ESM.pdf]

**A****B**
