# Supplementary material for: Comparative genomics revealed the gene evolution and functional divergence of magnesium transporter families in Saccharum
Source: BMC Genomics. 2019 Jan 24;20:83. doi: 10.1186/s12864-019-5437-3 (PMC6345045; doi:10.1186/s12864-019-5437-3)
Supplement: Supplementary file 15 — Expression patterns of MGT genes across leaf gradient segments in maize and rice [88]. (XLSX 24 kb) [file 12864_2019_5437_MOESM15_ESM.xlsx]

## Sheet: Sheet1
Additional File Expression patterns of MGT genes across leaf gradient segments in maize and rice(Wang et al.,2013)
Maize Gene ID	Maize Gene ID	M1	M2	M3	M4	M5	M6	M7	M8	M9	M10	M11	M12	M13	M14	M15
GRMZM2G108477_ZmMGT1	GRMZM2G108477	2.82352	3.39357	5.2879	5.28247	8.06424	7.17791	9.30257	10.5805	10.1206	12.2132	11.843	11.3399	11.7899	9.357	9.6168
GRMZM2G170326_ZmMGT2	GRMZM2G170326	2.30376	2.86387	4.23068	3.78025	3.81209	4.53875	4.3988	4.58635	4.89792	4.87344	5.097	4.36239	4.56449	4.26894	3.69473
GRMZM2G064467_ZmMGT3	GRMZM2G064467	6.14004	6.4185	5.46805	5.37143	5.17532	4.45666	4.31088	3.59166	2.04551	2.2989	1.66386	1.58983	1.3607	1.54482	1.1979
GRMZM2G145794_ZmMGT4	GRMZM2G145794	3.52489	4.30572	3.83164	5.02366	4.12085	4.84353	5.04622	5.15998	5.57489	5.17105	5.10579	6.33386	6.5929	6.57743	7.86875
GRMZM2G159295_ZmMGT5	GRMZM2G159295	6.58919	6.45993	7.67917	5.98005	5.53763	4.28486	3.81429	5.41732	5.85714	6.02398	5.15389	6.11633	5.33731	7.27982	7.01096
GRMZM2G453832_ZmMGT6	GRMZM2G453832	3.22992	2.81178	2.6124	2.42764	2.29935	2.36918	1.88261	2.13948	2.04519	1.63859	1.51408	1.9694	2.05585	1.85864	2.37047
GRMZM2G458879_ZmMGT7	GRMZM2G458879	N/A	N/A	N/A	N/A	N/A	N/A	N/A	N/A	N/A	N/A	N/A	N/A	N/A	N/A	N/A
GRMZM2G065971_ZmMGT8	GRMZM2G065971	2.3392	2.21586	2.08463	1.68763	1.56875	1.54583	0.797114	1.44984	2.21	2.63081	2.12792	2.45785	2.1895	2.60999	2.97427
GRMZM2G139822_ZmMGT9	GRMZM2G139822	9.68478	9.56504	8.90018	7.22517	6.33365	6.89195	4.85356	6.95946	7.33354	7.93782	8.23099	8.88528	8.29781	9.99168	7.72004
GRMZM2G018706_ZmMGT10	GRMZM2G018706	0.365791	0.0837428	0.179101	0.295517	0.553846	0	0	0	0.207086	0.217135	0.133895	0.0390104	0.222363	0.376139	0.100896
GRMZM2G054632_ZmMGT11	GRMZM2G054632	4.53784	9.08947	8.46615	4.04452	1.50896	1.90132	1.76192	1.45226	0.59583	0.520246	0.432079	0.356689	0.218275	0.193419	0.17123
GRMZM2G420436_ZmMGT12	GRMZM2G420436	15.0011	21.2694	21.2248	21.7593	20.1472	18.6624	17.3163	20.3835	20.9018	21.5103	21.5992	22.9847	20.2429	23.4207	22.3807
Rice Gene ID	Rice Gene ID	R1	R2	R3	R4	R5	R6	R7	R8	R9	R10	R11
Os06t0650800	LOC_Os06g44150	2.34895	2.39413	2.36035	3.23998	3.59332	3.9491	3.34767	4.42062	3.86834	4.78774	5.89929
Os01t0869200	LOC_Os01g64890	2.15421	1.4286	2.46187	1.62169	1.5426	1.48529	1.63439	2.20448	2.90284	3.59828	7.31556
Os01t0908500	LOC_Os01g68040	10.9841	11.9198	7.32089	9.36783	8.97818	8.58244	5.40053	6.91998	7.1013	8.22944	11.1715
Os10g0545000	LOC_Os10g39790	3.44241	3.81138	2.36293	2.66215	2.96886	3.08679	2.50904	2.76643	2.4966	3.76416	6.33926
Os03t0137700	LOC_Os03g04480	0.147588	0.0866037	0.193273	0.232532	0	0	0	0.328856	0	0	0.142648
Os03t0684400	LOC_Os03g48000	38.1352	50.0494	71.8768	97.3795	134.168	204.333	262.133	302.83	335.361	336.072	313.094
Os03t0742400	LOC_Os03g53110	8.89438	6.7342	4.96835	6.61231	6.53488	5.53896	5.02858	6.30381	6.11864	7.97269	8.65089
Os04t0430900	LOC_Os04g35160	0.0946365	0	0.144488	0	0	0	0	0	0.19815	0.247674	0.464209
Os04g0501100	LOC_Os04g42280	5.08823	3.61707	5.66536	5.24763	7.27901	5.75394	7.02105	6.37766	7.23447	6.39703	9.11172
Note: RPKM values of GRMZM2G458879 genes was absent.
Reference: comparative analyses of c4 and c3 photosynthesis in developing leaves of maize and rice
